# Supplementary material for: Characterization of Phytopythium Species Involved in the Establishment and Development of Kiwifruit Vine Decline Syndrome
Source: MDPI journal article supplement (doi:10.3390/microorganisms11010216), 2023-01-15
Supplement: s1 [file s1]

**Supplementary Table S1** - Strain name and information about orchards from where the strains were isolated (geographical location, geographical coordinates and orchard number).

| Strain    | Geographical location    | Geographical coordinates |          | Orchard number |
|-----------|--------------------------|--------------------------|----------|----------------|
| PH1       | Alice Castello (VC)      |                          |          |                |
| PH6       | Alice Castello (VC)      | 45.341391                | 8.063265 | 1              |
| PH3       | Alice Castello (VC)      |                          |          |                |
| PH2       | Alice Castello (VC)      |                          |          |                |
| GBI       | Lagnasco (CN)            | 44.646031                | 7.536226 | 2              |
| 4SRE1     | Lagnasco (CN)            |                          |          |                |
| 4SRE2     | Lagnasco (CN)            |                          |          |                |
| 4SBE_2C1  | Lagnasco (CN)            | 44.64273                 | 7.5318   | 3              |
| 4SBE_C2A  | Lagnasco (CN)            |                          |          |                |
| 4SBE_C2B  | Lagnasco (CN)            |                          |          |                |
| 4SBE_C2D  | Lagnasco (CN)            |                          |          |                |
| 4SBE_1C1  | Lagnasco (CN)            |                          |          |                |
| 4SBE_C1A  | Lagnasco (CN)            |                          |          |                |
| 4SBE_C2C  | Lagnasco (CN)            |                          |          |                |
| 4SBE_4C2  | Lagnasco (CN)            |                          |          |                |
| 4SBE_3C2  | Lagnasco (CN)            |                          |          |                |
| 4/16_DRE  | Costigliole Saluzzo (CN) |                          |          |                |
| 5/16_CBE  | Saluzzo (CN)             | 44.637117                | 7.510636 | 5              |
| 6/16_BRE  | Lagnasco (CN)            | 44.631046                | 7.569694 | 6              |
| 11/16_AB1 | Manta (CN)               | 44.621428                | 7.50211  | 7              |
| 12/16_DR2 | Lagnasco (CN)            | 44.631889                | 7.551037 | 8              |
| 12/16_CR1 | Lagnasco (CN)            |                          |          |                |
| 12/16_AB1 | Lagnasco (CN)            |                          |          |                |
| 13/16_DR2 | Lagnasco (CN)            | 44.631889                | 7.542089 | 9              |
| 13/16_DR3 | Lagnasco (CN)            |                          |          |                |
| 10/16_BR  | Saluzzo (CN)             | 44.631051                | 7.500237 | 10             |
| PP1       | Revello (CN)             | 44.655846                | 7.417273 | 11             |
| PP2       | Revello (CN)             |                          |          |                |
| PP3       | Revello (CN)             |                          |          |                |
| PP4       | Revello (CN)             |                          |          |                |
| PP5       | Revello (CN)             |                          |          |                |
| PP6       | Revello (CN)             |                          |          |                |
| PP8       | Revello (CN)             |                          |          |                |
| PPA       | Manta (CN)               |                          |          |                |
| PPC       | Manta (CN)               | 44.610421                | 7.50515  | 12             |
| PPD       | Manta (CN)               |                          |          |                |
| PPE       | Manta (CN)               |                          |          |                |
| PPF       | Manta (CN)               |                          |          |                |
| CA1       | Verzuolo (CN)            | 44.59772                 | 7.511737 | 13             |
| CA2       | Verzuolo (CN)            |                          |          |                |
| CA3       | Verzuolo (CN)            |                          |          |                |
| CA4       | Verzuolo (CN)            |                          |          |                |

| Strain | Geographical location | Geographical coordinates |          | Orchard number |
|--------|-----------------------|--------------------------|----------|----------------|
| CA5    | Verzuolo (CN)         |                          |          |                |
| R1A    | Manta (CN)            |                          |          |                |
| R1B    | Manta (CN)            |                          |          |                |
| R1C    | Manta (CN)            |                          |          |                |
| R1D    | Manta (CN)            |                          |          |                |
| R1E    | Manta (CN)            |                          |          |                |
| R1F    | Manta (CN)            | 44.61569                 | 7.541091 | 14             |
| R1G    | Manta (CN)            |                          |          |                |
| R1H    | Manta (CN)            |                          |          |                |
| R3A    | Manta (CN)            |                          |          |                |
| T4A    | Manta (CN)            |                          |          |                |
| T4B    | Manta (CN)            |                          |          |                |
| R7A    | Saluzzo (CN)          |                          |          |                |
| R7B    | Saluzzo (CN)          |                          |          |                |
| R7C    | Saluzzo (CN)          | 44.64629                 | 7.532261 | 15             |
| R7D    | Saluzzo (CN)          |                          |          |                |
| R7E    | Saluzzo (CN)          |                          |          |                |
| R7F    | Saluzzo (CN)          |                          |          |                |
| P8A    | Lagnasco (CN)         |                          |          |                |
| P8B    | Lagnasco (CN)         |                          |          |                |
| P8D    | Lagnasco (CN)         |                          |          |                |
| P8E    | Lagnasco (CN)         | 44.639418                | 7.584365 | 16             |
| P8F    | Lagnasco (CN)         |                          |          |                |
| P8G    | Lagnasco (CN)         |                          |          |                |
| P8H    | Lagnasco (CN)         |                          |          |                |
| P8I    | Lagnasco (CN)         |                          |          |                |
| R10A   | Scarnafigi (CN)       | 44.660261                | 7.547556 | 17             |
| R10B   | Scarnafigi (CN)       |                          |          |                |
| RE3    | Saluzzo (CN)          | 44.647014                | 7.551447 | 18             |

**Supplementary Table S2** - List of species, strain designation and accession numbers for ITS and LSU regions and COI gene used for the phylogeny of *Phytopythium* spp. isolated from kiwifruit roots in this study.

| Species                          | Strain designation | Accession numbers |               |          |
|----------------------------------|--------------------|-------------------|---------------|----------|
|                                  |                    | ITS               | LSU           | COI      |
| <i>Phytopythium aichiense</i>    | CBS 137195         | AB948197          | AB948194      | AB948191 |
| <i>Phytopythium boreale</i>      | CBS551.88          | AY598662          | AB690596      | HQ708419 |
| <i>Phytopythium carbonicum</i>   | CBS112544          | HQ643373          | AB948196      | HQ708420 |
| <i>Phytopythium chamaehyphon</i> | CBS259.30          | AY598666          | AY598666      | HQ708421 |
| <i>Phytopythium citrinum</i>     | CBS119171          | HQ643375          | AB948195      | HQ708422 |
| <i>Phytopythium delawareense</i> | CBS123040          | EU339312          | AB690598      | KF853240 |
| <i>Phytopythium dogmae</i>       | USTCMS 4101        | MF353170          | MF373431      | MF359559 |
| <i>Phytopythium fagopyri</i>     | CBS 293.35         | AB690617          | AB690590      | AB690641 |
| <i>Phytopythium helicoides</i>   | CBS286.31          | AY598665          | HQ665186      | HQ708430 |
| <i>Phytopythium iriomotense</i>  | CBS137104          | AB690629          | AB690607      | AB690659 |
| <i>Phytopythium kandeliae</i>    | CBS113.91          | HQ643133          | HQ665079      | HQ708206 |
| <i>Phytopythium leanoi</i>       | USTCMS 4102        | MF353169          | MF373430      | MF359558 |
| <i>Phytopythium litorale</i>     | CBS118360          | HQ643386          | HQ665082      | HQ708433 |
| <i>Phytopythium megacarpum</i>   | CBS 112351         | HQ643388          | AB690584      | AB690635 |
| <i>Phytopythium mercuriale</i>   | CBS122443          | AB690614          | AB690585      | AB690636 |
| <i>Phytopythium mirpureense</i>  | CBS124523          | KJ831613          | not available | KJ831612 |
| <i>Phytopythium montanum</i>     | CBS111349          | AB725883          | AB690586      | AB690637 |
| <i>Phytopythium nanjingense</i>  | Chen 218           | MF459636          | not available | MF459633 |
| <i>Phytopythium oedochilum</i>   | CBS292.37          | AB690619          | HQ665191      | AB690646 |
| <i>Phytopythium ostracodes</i>   | CBS768.73          | AY598663          | AB690587      | AB690638 |
| <i>Phytopythium palingenes</i>   | CCIBt 3981         | KR092139          | KR092143      | KT897702 |
| <i>Phytopythium sindhum</i>      | DAOM 238986        | HQ643396          | HQ665309      | HQ708443 |
| <i>Phytopythium vexans</i>       | CBS119.80          | HQ643400          | HQ665090      | HQ708447 |
| <i>Phytopythium vexans</i>       | NBRC107442         | AB690626          | AB690604      | AB690656 |
| <i>Phytopythium vexans</i>       | NBRC107393         | AB690630          | AB690608      | AB690660 |
| <i>Phytopythium vexans</i>       | NBRC107380         | AB690627          | AB690605      | AB690657 |
| <i>Phytopythium vexans</i>       | NBRC107381         | AB690628          | AB690606      | AB690658 |
| <i>Phytopythium vexans</i>       | NBRC107397         | AB690610          | AB690581      | AB690632 |
| <i>Pythium ultimum</i>           | CBS 398.51         | AY598657          | HQ665227      | HQ708906 |
